# Supplementary material for: Cytokine Levels in Saliva Are Associated with Salivary Gland Fibrosis and Hyposalivation in Mice after Fractionated Radiotherapy of the Head and Neck
Source: MDPI journal article supplement (doi:10.3390/ijms242015218), 2023-10-16
Supplement: s1 [file s1]

# Cytokine levels in saliva are associated with salivary gland fibrosis and hyposalivation in mice after fractionated radiotherapy of the head and neck

## Supplementary figures

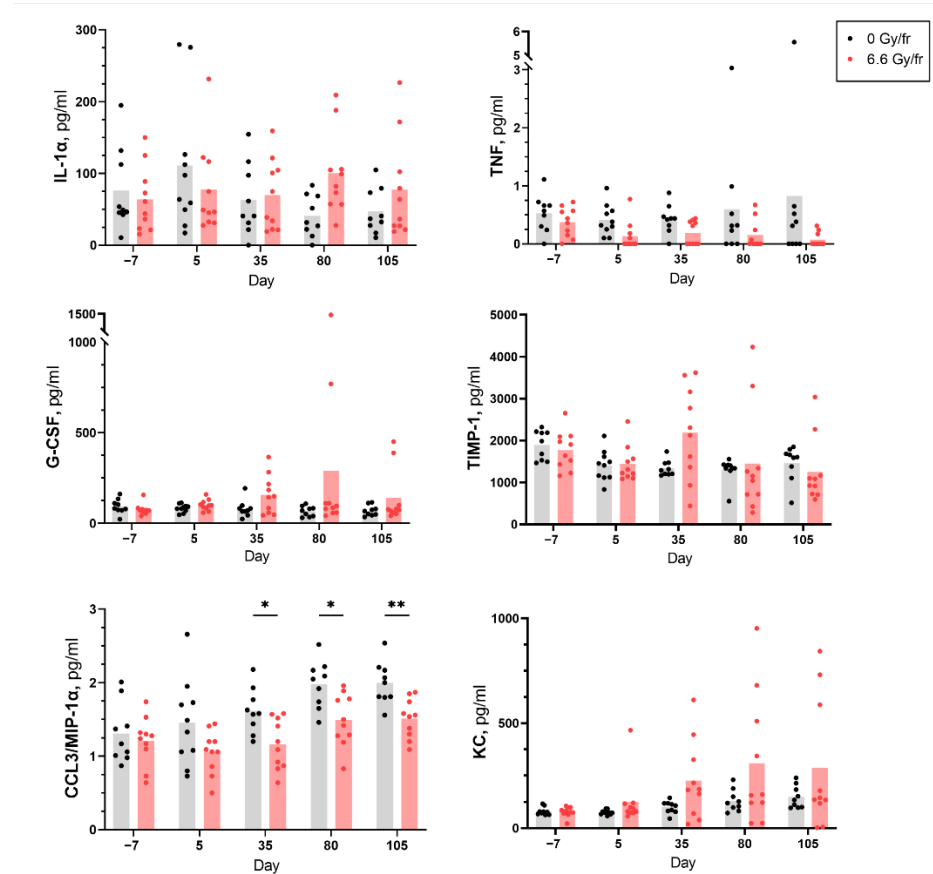

**Figure S1.** Levels of serum cytokines IL-1 $\alpha$ , TNF, G-CSF, TIMP-1, MIP-1 $\alpha$  and KC before and after fractionated irradiation at days -7, 5, 35, 80 and 105 (n = 9 in the control group, n = 10 in the irradiated group). Each dot represents an individual mouse. Data are presented as mean pg/mL cytokine (\*p<0.05, \*\*p<0.01).

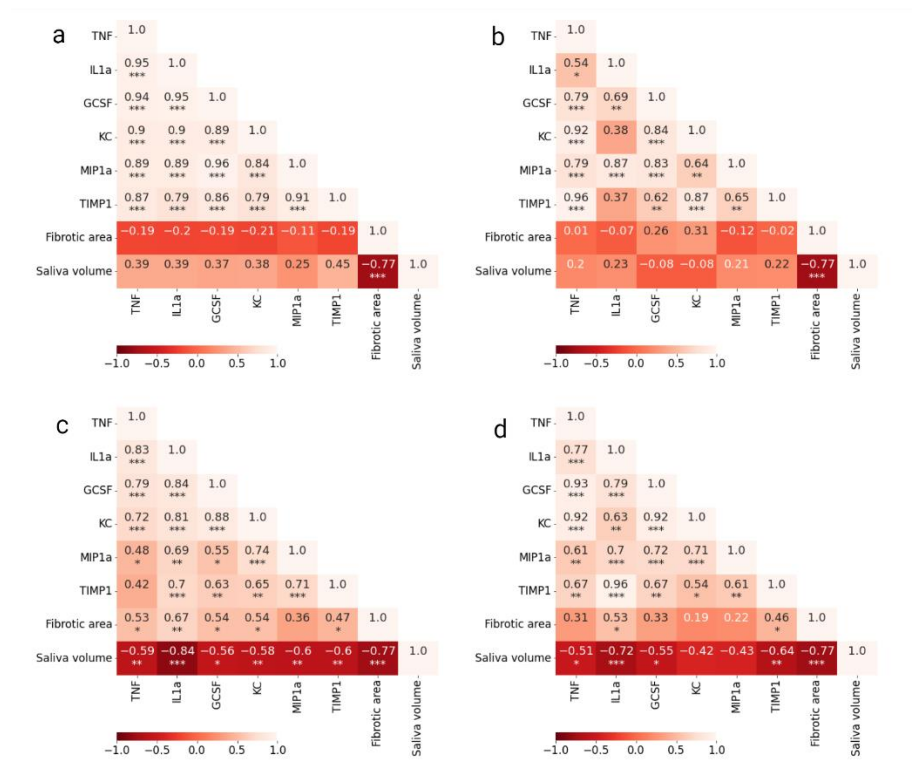

**Figure S2.** Pearson's correlation matrix with significance for combined (controls and irradiated) salivary cytokine expression on: (a) baseline, (b) day 5, (c) day 80, (d) day 105 (\*p<0.05, \*\*p<0.01, \*\*\*p<0.001).

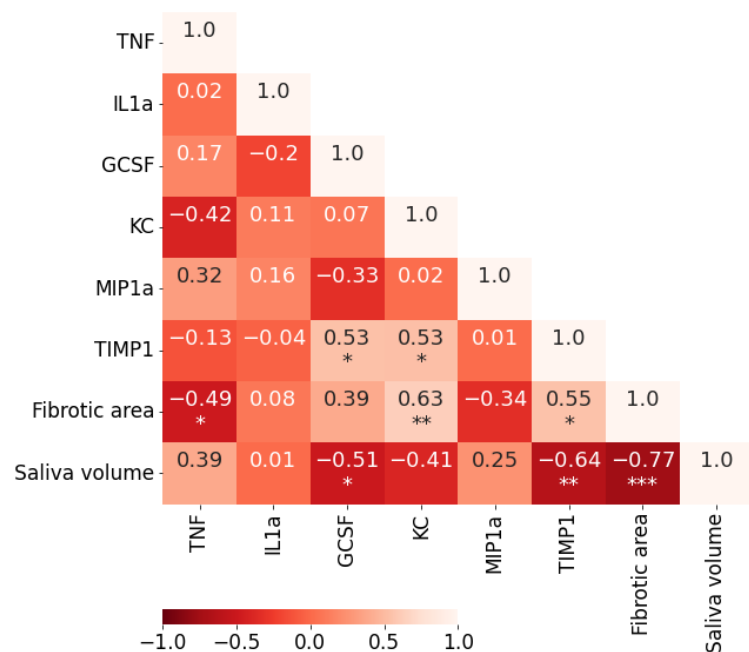

**Figure S3.** Pearson's correlation matrix with significance for combined cytokine levels in serum on day 35 (\*p<0.05, \*\*p<0.01, \*\*\*p<0.001).
